# Supplementary material for: Critical Transitions at Campi Flegrei resurgent caldera: A Novel Approach to Detect Early Warning Signals
Source: Research Square preprint supplement (doi:10.21203/rs.3.rs-7290139/v1), 2025-08-19
Supplement: Supplementary file 1 [file 920b6efcc177b10dcdabadbb.docx]

**SUPPLEMENTAY MATERIALS OF**

**Critical Transitions at Campi Flegrei resurgent caldera:**

**A Novel Approach to Detect Early Warning Signals**

Vitale A.1,2, Barone A.3,2, Marotta E.4, Vitale D. F.5, Pepe S. 3,2, Peluso R.4, Castaldo R. 3,2, Avino R.4, Mercogliano F.6,3,2, Pepe A.3, Accomando F.3,2, Avvisati G.4, Belviso P.4, Bellucci Sessa E.4, Carandente A.4, Perrini M.3,2, Sansivero F.4 and Tizzani P. 3,2,*

1. Istituto per i Sistemi Agricoli e Forestali del Mediterraneo (ISAFoM) - (CNR), Piazzale E. Fermi, 1, 80055 Portici (NA), Italia
2. GAIA iLAB. (CNR) at Portici Research Center, Piazzale E. Fermi, 1, 80055 Portici (NA), Italia
3. Istituto per il Rilevamento Elettromagnetico dell'Ambiente (IREA) - (CNR), Via Diocleziano, 328 80124 Napoli, Italia
4. Istituto Nazionale di Geofisica e Vulcanologia (INGV), Osservatorio Vesuviano, Via Diocleziano 328, 80124 Napoli, Italia
5. Casa di Cura San Michele, Via Montella 16, 81024 Maddaloni (CE), Italia.
6. Dipartimento di Ingegneria (DI), Università degli Studi di Napoli ‘Parthenope’, Centro Direzionale Isola C4, 80143 Napoli, Italia

(*) corresponding author: pietro.tizzani@cnr.it

**Introduction to Seismic Clustering Analysis**

This supplementary section provides an in-depth visual and quantitative analysis of the seismic dataset used in the study, with a focus on the clustering structure of hypocentral locations within the Campi Flegrei caldera, as identified through the **Density-Based Spatial Clustering of Applications with Noise (DBSCAN)** algorithm. The primary aim is to explore the spatial, vertical, and magnitude-related characteristics of seismicity and their implications for interpreting subsurface processes in a highly active volcanic system.

The analysis covers the temporal interval and spatial domain consistent with the main study and is based on the GOSSIP catalog provided by INGV-OV. The clustering procedure used a search radius of 206 meters and a minimum cluster size of six events, calibrated to the dimensionality of the spatial input matrix. These parameters were selected to robustly isolate meaningful seismic structures while minimizing spurious groupings.

Figure S1 presents the initial overview of seismicity, contrasting unclustered seismicity with DBSCAN-detected clusters. It includes 3D and 2D representations of hypocentral distributions, emphasizing the emergence of a vertically extensive and spatially coherent seismic column (notably in Cluster 1), in line with potential fluid or fracture conduit systems. Figures S2 through S4 detail the planimetric and vertical projections (YZ and XZ sections) of each cluster, revealing both the geometrical isolation and depth localization of minor clusters (2–7), and the centrality and structural coherence of Cluster 1. These views are critical for assessing the spatial continuity and physical context of seismic activity, particularly in relation to topography and potential fluid pathways.

The analysis also explores the magnitude-frequency distributions (see Figure S5), exposing variability in seismic behavior among clusters. While Cluster 1 displays a well-defined Gutenberg-Richter trend, indicative of a dynamically active and statistically robust population, minor clusters are often composed of fewer events and narrower magnitude ranges, potentially linked to transient or swarm-like episodes. Finally, Figure S6 reports the normalized cumulative strain release across clusters, revealing a strong asymmetry in energy partitioning. Cluster 1 accounts for more than 80% of the total seismic moment, affirming its mechanical dominance and possible role as the principal structure accommodating stress release and fluid migration. The residual contributions from minor clusters suggest episodic, localized processes, possibly associated with structural heterogeneities or transient pressurization phenomena.

Together, these supplementary materials provide essential insights into the spatiotemporal organization of seismicity at Campi Flegrei, supporting the interpretation of critical transitions within the volcanic system and complementing the multiparametric analysis presented in the main text.

**Supplementary Figures:**

**
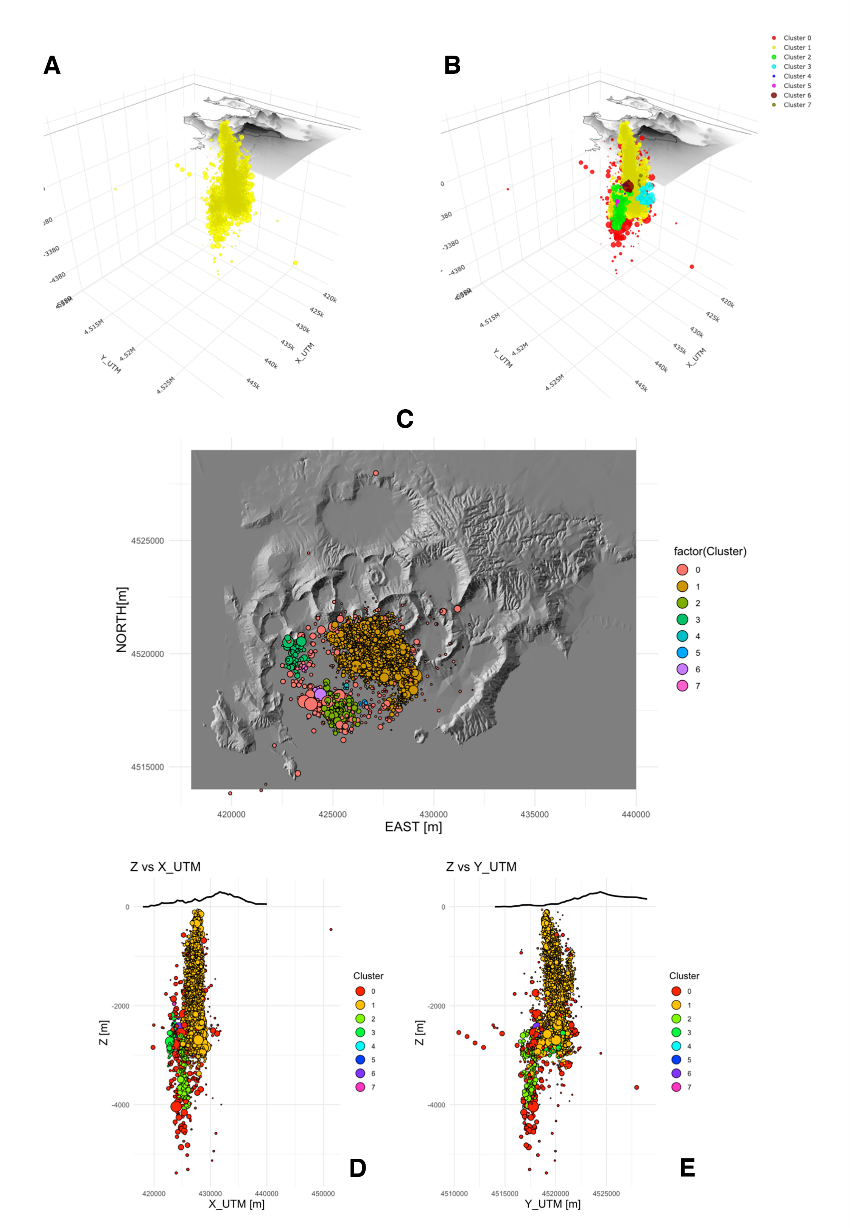
**

**Fig. S1. Analysis of seismicity of the Campi Flegrei volcanic area based on the OV-INGV GOSSIP catalog.**(a) Hypocentral locations of seismic events, with symbol size proportional to magnitude as calculated by OV-INGV. (b) Result of the clustering analysis performed using the DBSCAN algorithm. The search ellipse radius was set to 206 meters, and the minimum number of events per cluster was determined based on the dimensionality of the input matrix (minimum = 6 events). (c) Plan view showing the spatial distribution of the identified clusters superimposed on a shaded relief map derived from the 2000 Shuttle Radar Topography Mission (SRTM) Digital Elevation Model (DEM). Event sizes are scaled according to magnitude. (d) Vertical cross-section of hypocenters projected along the X-UTM direction, including the topographic profile extracted from the DEM. (e) Vertical cross-section of hypocenters projected along the Y-UTM direction, also showing the corresponding topographic profile. The figure illustrates the spatial distribution and vertical extent of clustered seismicity at Campi Flegrei, highlighting a well-defined, vertically elongated seismic volume, particularly evident in Cluster 1. The topographic integration emphasizes the shallow nature of most hypocenters and their alignment with known structural features of the caldera.

**
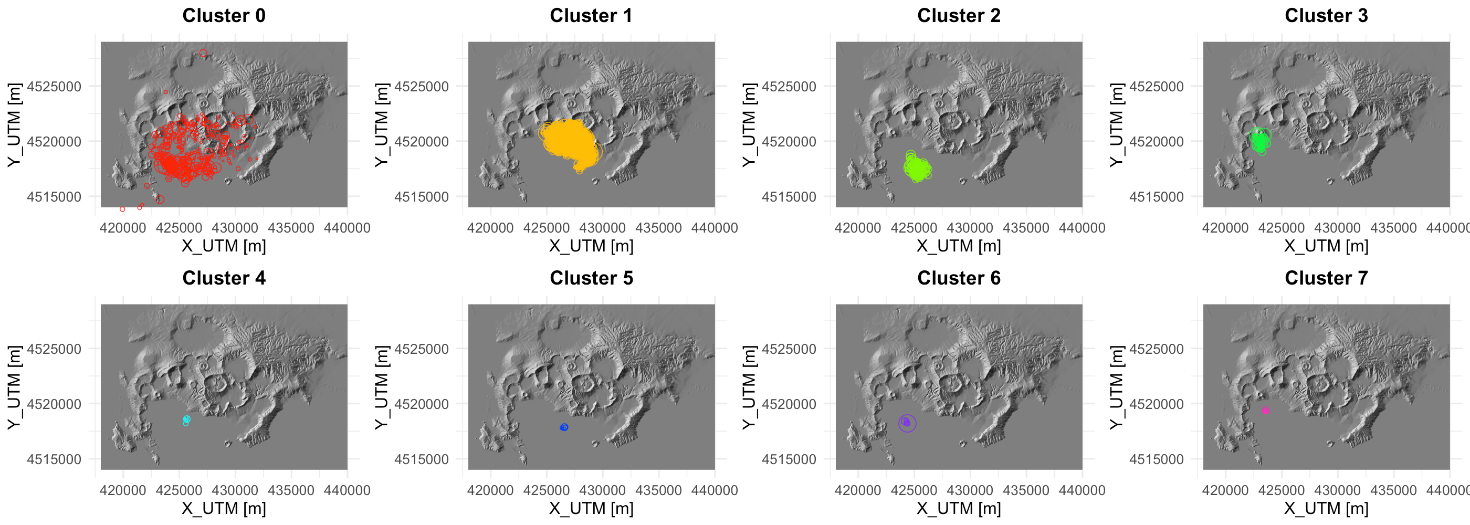
**

**Fig. S2.** **Spatial distribution of seismic clusters identified using the DBSCAN algorithm**, superimposed on a shaded relief map derived from the 2000 Shuttle Radar Topography Mission (SRTM) Digital Elevation Model (DEM). *Cluster 0* includes seismic events that were not grouped into any cluster—commonly referred to as noise or unclustered events. These events are dispersed across a broader area, indicating either widespread background seismicity or events that fail to meet the density thresholds required by the DBSCAN algorithm. The spatial segregation of the clusters highlights the presence of distinct seismic zones within the Campi Flegrei caldera. *Cluster 1* is notably the most spatially compact and centrally located, while other clusters are associated with more localized seismic swarms. *Clusters 1 to 3* exhibit relatively higher spatial continuity and are mostly concentrated in the central sectors of the caldera. These minor clusters appear as small, compact, and isolated groups typically composed of a limited number of events. Instead, *Clusters 4 to 7* display a markedly localized spatial distribution: *Clusters 4* and *5* are situated in the southwestern sector of the caldera, whereas *Clusters 6* and *7* are even more peripheral and sparsely populated. Their minimal areal extent suggests highly confined sources, potentially linked to localized stress accumulation, discrete fracture systems, or transient fluid migration episodes. The spatial isolation of these clusters may also reflect their temporal uniqueness, supporting the hypothesis of swarm-like or episodic behavior not necessarily related to the broader deformation regime of the Campi Flegrei system.

**
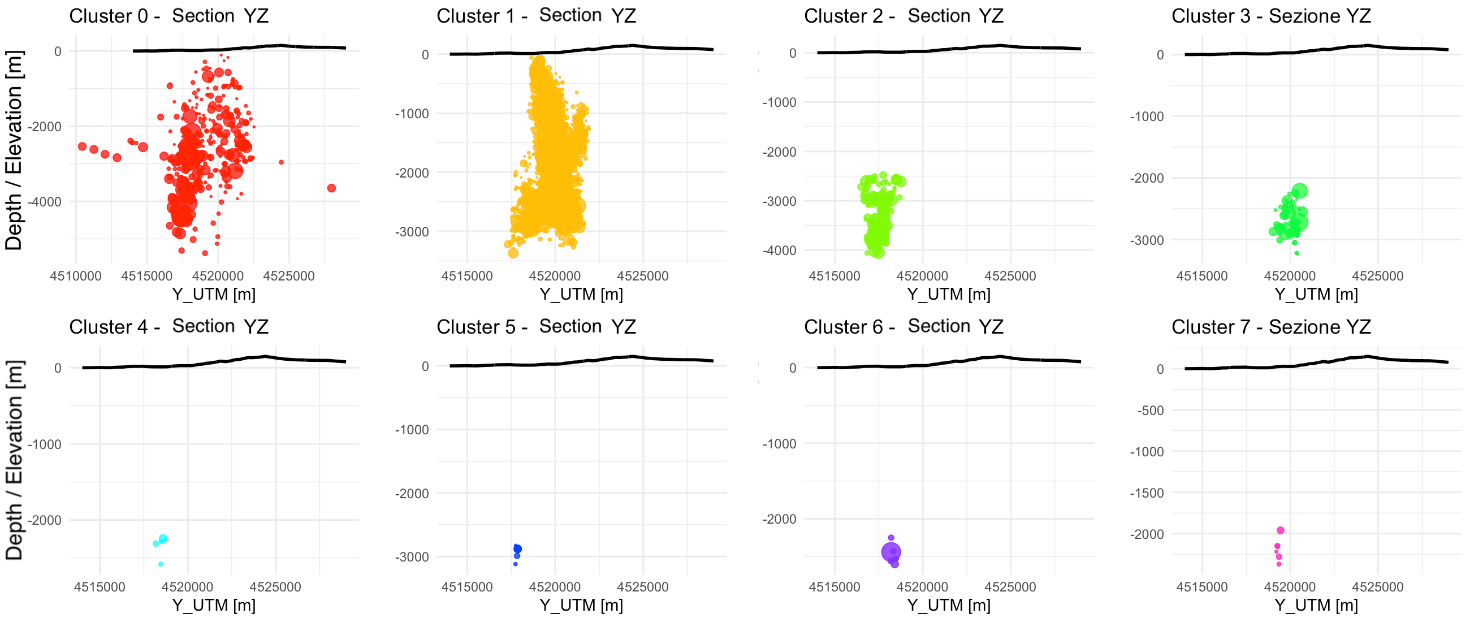
**

**Fig. S3.** **Vertical YZ cross-sections of hypocentral locations for each DBSCAN-identified cluster, projected along the Y-UTM direction.** Each subplot includes the corresponding topographic profile derived from the SRTM -DEM of the Campi Flegrei area. The cross-sectional views reveal the depth distribution of clustered seismicity. Cluster 1 extends from shallow levels (~0 to -3 km), may be consistent with hydrothermal and/or magmatic sources. Other clusters (e.g., Clusters 2–7) are more localized in depth and highlight deeper isolated sources, potentially related to localized fracturing or mass migrations.

**
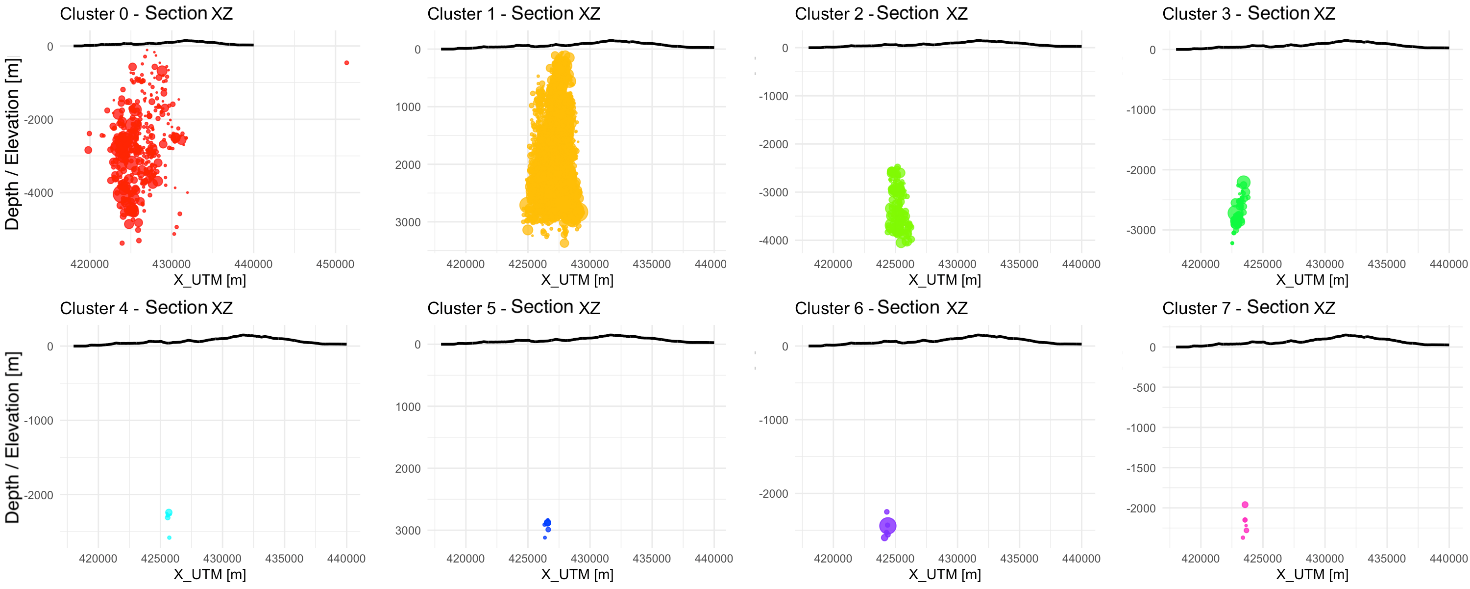
**

**Fig. S4.** **Vertical XZ cross-sections of hypocentral locations for each DBSCAN-identified cluster, projected along the X-UTM direction.** Each subplot includes the corresponding topographic profile derived from the SRTM - DEM of the Campi Flegrei area. These cross-sections provide additional constraints on the lateral and vertical distribution of the seismic clusters. Cluster 1 confirms its vertically elongated structure with limited lateral extension, likely associated with a persistent fracture system or fluid conduit. The unclustered events in Cluster 0 display a broader spatial distribution both laterally and in depth, indicating possible background activity or unresolved mixed sources. The isolated nature of Clusters 2 to 7 is again evident, highlighting discrete source regions at depth with minimal lateral dispersion.

**
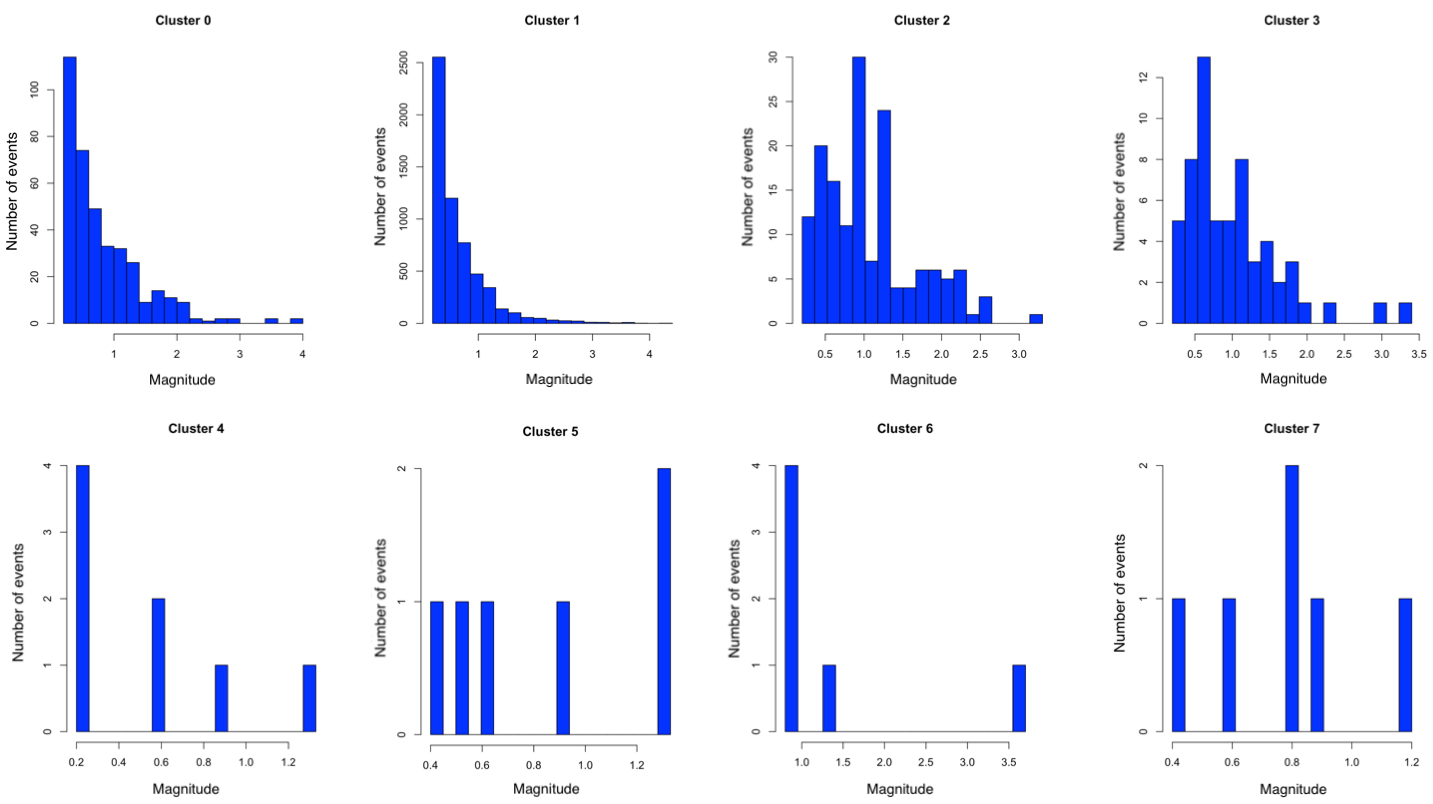
**

**Fig. S5.** **Magnitude-frequency distributions for each DBSCAN-identified cluster in the Campi Flegrei seismicity dataset.** Histograms display the number of events as a function of magnitude for each cluster, including unclustered events (Cluster 0). Cluster 0, representing unclustered events, also displays a decreasing trend with magnitude but shows more irregularity, potentially reflecting heterogeneity in detection and location quality. The distributions reflect both the size and seismic characteristics of each group, with Cluster 1 clearly dominating in terms of event count and completeness range. The histograms reveal a distinct variability in the magnitude-frequency distribution across clusters. Cluster 1 exhibits a classical Gutenberg-Richter-like decay, indicative of a well-sampled and active seismic domain. Clusters 2 and 3 contain a sufficient number of events to support statistical analysis, showing a magnitude range up to ~3.0. In contrast, Clusters 4 to 7 are composed of very few events with narrow magnitude ranges, likely corresponding to localized or isolated micro seismic swarms.

**
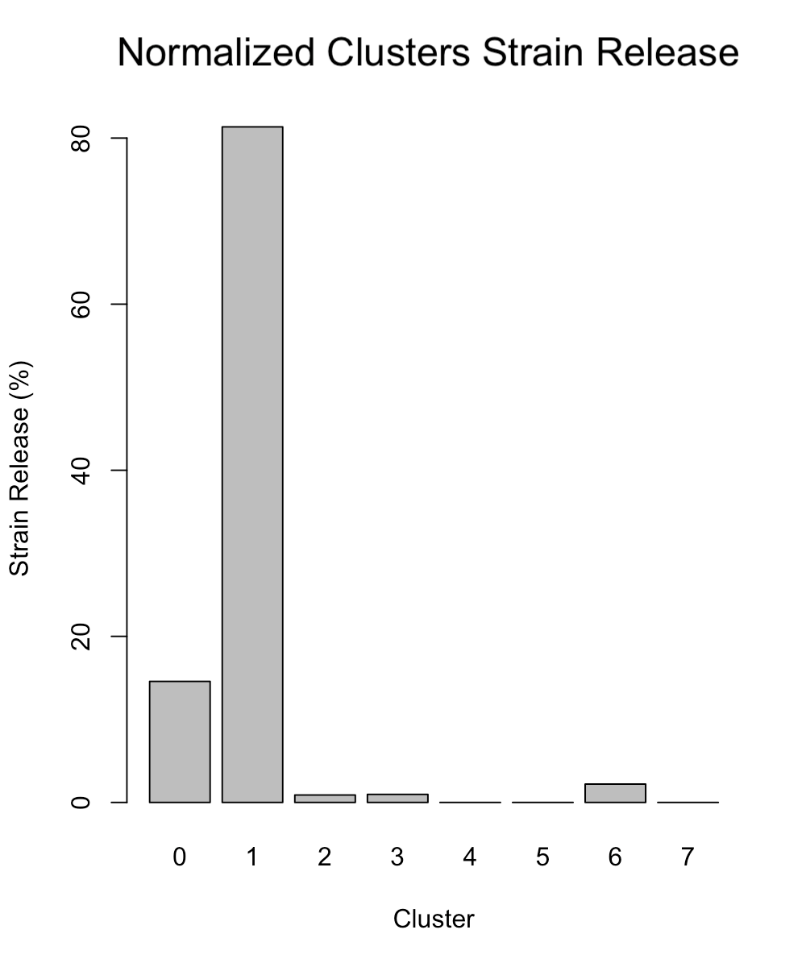
**

**Fig. S6.** **Normalized cumulative strain release (%) for each seismic cluster identified by the DBSCAN algorithm.** The strain release was computed by summing the seismic moment for each cluster, estimated using the empirical relation *M0*=101.5M+4.8 where *M* is the event magnitude. Values were then normalized to the total strain release across all clusters. Cluster 0 (unclustered events) also contributes significantly (~14%), suggesting a widespread background deformation or unresolved seismicity not captured by DBSCAN's density-based criteria. Cluster 1 dominates the strain release budget, accounting for more than 80% of the total, which emphasizes its mechanical and tectonic relevance within the Campi Flegrei system. The remaining clusters (2–7) each contribute less than 3% individually, reflecting more spatially localized or less energetically significant activity. This distribution highlights the asymmetric nature of strain partitioning in the area and reinforces the importance of Cluster 1 in ongoing volcanic unrest.
